# Supplementary material
Source: PubMed Central journal article supplement (PMC4506707)
Supplement: NIHMS701909-supplement-306830R1_Acknowledgment_Permissions.pdf [file NIHMS701909-supplement-306830R1_Acknowledgment_Permissions.pdf]

## Circulation Research

---

**From:** Hodes, Richard (NIH/NIA) [E] <hodesr@31.nia.nih.gov>  
**Sent:** Sunday, June 07, 2015 9:07 PM  
**To:** Lauer, Michael (NIH/NHLBI) [E]; Gibbons, Gary (NIH/NHLBI) [E]; Lorsch, Jon (NIH/NIGMS) [E]; Addou, Ebyan A (NIH/NHLBI) [E]; Coady, Sean (NIH/NHLBI) [E]; Dimichele, Donna (NIH/NHLBI) [E]; Hoots, W. Keith (NIH/NHLBI) [E]  
**Cc:** circulation.research@circresearch.com  
**Subject:** RE: REPLY REQUESTED by COB Wed June 10 -- Is it OK to acknowledge you on our revised Circ Research commentary on peer review (CIRCRES 2015 306830)

Hi Mike,

Thank you – formal acknowledgement not at all necessary, but yes I am comfortable.  
Richard

---

**From:** Lauer, Michael (NIH/NHLBI) [E]  
**Sent:** Sunday, June 07, 2015 8:35 PM  
**To:** Gibbons, Gary (NIH/NHLBI) [E]; Lorsch, Jon (NIH/NIGMS) [E]; Hodes, Richard (NIH/NIA) [E]; Addou, Ebyan A (NIH/NHLBI) [E]; Coady, Sean (NIH/NHLBI) [E]; Dimichele, Donna (NIH/NHLBI) [E]; Hoots, W. Keith (NIH/NHLBI) [E]  
**Cc:** circulation.research@circresearch.com  
**Subject:** REPLY REQUESTED by COB Wed June 10 -- Is it OK to acknowledge you on our revised Circ Research commentary on peer review (CIRCRES 2015 306830)  
**Importance:** High

Hi Gary, Jon, Richard, Ebyan, Sean, Donna, and Keith

Please let me know by clicking “REPLY ALL” if you are comfortable with our acknowledging your help with this paper. The language is on page 7:

We are grateful to Gary Gibbons (Director of NHLBI), Jon Lorsch (Director of NIGMS), and Richard Hodes (Director of NIA) for their helpful comments on earlier versions of this paper. We are grateful to Ebyan Addou and Sean Coady for curating grant and citation data. We also thank Donna DiMichele and W. Keith Hoots for helping NHLBI secure InCites data.

Many thanks again for all your help!

Best, Mike

Michael S Lauer, MD, FACC, FAHA  
Director, Division of Cardiovascular Sciences (DCVS), National Heart, Lung, and Blood Institute (NHLBI)  
6701 Rockledge Drive, Room 8128  
Bethesda, MD 20892  
Phone: 301-435-0422  
Email: [lauerm@nhlbi.nih.gov](mailto:lauerm@nhlbi.nih.gov)

---

**From:** <Lauer>, "Lauer, Michael (NIH/NHLBI) [E]" <[lauerm@nhlbi.nih.gov](mailto:lauerm@nhlbi.nih.gov)>  
**Date:** Sunday, June 7, 2015 at 8:23 PM  
**To:** "Kaltman, Jonathan (NIH/NHLBI) [E]" <[kaltmanj@nhlbi.nih.gov](mailto:kaltmanj@nhlbi.nih.gov)>, Colin Wu <[wuc@nhlbi.nih.gov](mailto:wuc@nhlbi.nih.gov)>, "Danthi, Narasimhan (NIH/NHLBI) [E]" <[ndanthi@nhlbi.nih.gov](mailto:ndanthi@nhlbi.nih.gov)>  
**Subject:** REPLY REQUESTED BY COB Wednesday June 10 -- Revised Circ Research Paper commentary on peer review

## Circulation Research

---

**From:** Addou, Ebyan A (NIH/NHLBI) [E] <addoue@nhlbi.nih.gov>  
**Sent:** Monday, June 08, 2015 9:38 AM  
**To:** Lauer, Michael (NIH/NHLBI) [E]; Gibbons, Gary (NIH/NHLBI) [E]; Lorsch, Jon (NIH/NIGMS) [E]; Hodes, Richard (NIH/NIA) [E]; Coady, Sean (NIH/NHLBI) [E]; Dimichele, Donna (NIH/NHLBI) [E]; Hoots, W. Keith (NIH/NHLBI) [E]  
**Cc:** circulation.research@circresearch.com  
**Subject:** RE: REPLY REQUESTED by COB Wed June 10 -- Is it OK to acknowledge you on our revised Circ Research commentary on peer review (CIRCRES 2015 306830)

Many Thanks for the acknowledgement Dr. Lauer.

Ebyan

---

**From:** Lauer, Michael (NIH/NHLBI) [E]  
**Sent:** Sunday, June 07, 2015 8:35 PM  
**To:** Gibbons, Gary (NIH/NHLBI) [E]; Lorsch, Jon (NIH/NIGMS) [E]; Hodes, Richard (NIH/NIA) [E]; Addou, Ebyan A (NIH/NHLBI) [E]; Coady, Sean (NIH/NHLBI) [E]; Dimichele, Donna (NIH/NHLBI) [E]; Hoots, W. Keith (NIH/NHLBI) [E]  
**Cc:** circulation.research@circresearch.com  
**Subject:** REPLY REQUESTED by COB Wed June 10 -- Is it OK to acknowledge you on our revised Circ Research commentary on peer review (CIRCRES 2015 306830)  
**Importance:** High

Hi Gary, Jon, Richard, Ebyan, Sean, Donna, and Keith

Please let me know by clicking "REPLY ALL" if you are comfortable with our acknowledging your help with this paper. The language is on page 7:

We are grateful to Gary Gibbons (Director of NHLBI), Jon Lorsch (Director of NIGMS), and Richard Hodes (Director of NIA) for their helpful comments on earlier versions of this paper. We are grateful to Ebyan Addou and Sean Coady for curating grant and citation data. We also thank Donna DiMichele and W. Keith Hoots for helping NHLBI secure InCites data.

Many thanks again for all your help!

Best, Mike

Michael S Lauer, MD, FACC, FAHA  
Director, Division of Cardiovascular Sciences (DCVS), National Heart, Lung, and Blood Institute (NHLBI)  
6701 Rockledge Drive, Room 8128  
Bethesda, MD 20892  
Phone: 301-435-0422  
Email: [lauerm@nhlbi.nih.gov](mailto:lauerm@nhlbi.nih.gov)

---

**From:** <Lauer>, "Lauer, Michael (NIH/NHLBI) [E]" <[lauerm@nhlbi.nih.gov](mailto:lauerm@nhlbi.nih.gov)>  
**Date:** Sunday, June 7, 2015 at 8:23 PM  
**To:** "Kaltman, Jonathan (NIH/NHLBI) [E]" <[kaltmanj@nhlbi.nih.gov](mailto:kaltmanj@nhlbi.nih.gov)>, Colin Wu <[wuc@nhlbi.nih.gov](mailto:wuc@nhlbi.nih.gov)>, "Danthi, Narasimhan (NIH/NHLBI) [E]" <[ndanthi@nhlbi.nih.gov](mailto:ndanthi@nhlbi.nih.gov)>  
**Subject:** REPLY REQUESTED BY COB Wednesday June 10 -- Revised Circ Research Paper commentary on peer review

## Circulation Research

---

**From:** Coady, Sean (NIH/NHLBI) [E] <coadys@nhlbi.nih.gov>  
**Sent:** Monday, June 08, 2015 8:11 AM  
**To:** Lauer, Michael (NIH/NHLBI) [E]; Gibbons, Gary (NIH/NHLBI) [E]; Lorsch, Jon (NIH/NIGMS) [E]; Hodes, Richard (NIH/NIA) [E]; Addou, Ebyan A (NIH/NHLBI) [E]; Dimichele, Donna (NIH/NHLBI) [E]; Hoots, W. Keith (NIH/NHLBI) [E]  
**Cc:** circulation.research@circresearch.com  
**Subject:** RE: REPLY REQUESTED by COB Wed June 10 -- Is it OK to acknowledge you on our revised Circ Research commentary on peer review (CIRCRES 2015 306830)

Thank you Mike! I would concur that formal acknowledgment is not needed, but the language is fine.

Sean Coady  
NHLBI/DCVS/PPSP/EB  
2 Rockledge Center  
Rm 10200, MSC 7936  
6701 Rockledge Drive  
Bethesda, MD 20892 (FedEX 20817)  
301-435-1289

---

**From:** Lauer, Michael (NIH/NHLBI) [E]  
**Sent:** Sunday, June 07, 2015 8:35 PM  
**To:** Gibbons, Gary (NIH/NHLBI) [E]; Lorsch, Jon (NIH/NIGMS) [E]; Hodes, Richard (NIH/NIA) [E]; Addou, Ebyan A (NIH/NHLBI) [E]; Coady, Sean (NIH/NHLBI) [E]; Dimichele, Donna (NIH/NHLBI) [E]; Hoots, W. Keith (NIH/NHLBI) [E]  
**Cc:** circulation.research@circresearch.com  
**Subject:** REPLY REQUESTED by COB Wed June 10 -- Is it OK to acknowledge you on our revised Circ Research commentary on peer review (CIRCRES 2015 306830)  
**Importance:** High

Hi Gary, Jon, Richard, Ebyan, Sean, Donna, and Keith

Please let me know by clicking "REPLY ALL" if you are comfortable with our acknowledging your help with this paper. The language is on page 7:

We are grateful to Gary Gibbons (Director of NHLBI), Jon Lorsch (Director of NIGMS), and Richard Hodes (Director of NIA) for their helpful comments on earlier versions of this paper. We are grateful to Ebyan Addou and Sean Coady for curating grant and citation data. We also thank Donna DiMichele and W. Keith Hoots for helping NHLBI secure InCites data.

Many thanks again for all your help!

Best, Mike

Michael S Lauer, MD, FACC, FAHA  
Director, Division of Cardiovascular Sciences (DCVS), National Heart, Lung, and Blood Institute (NHLBI)  
6701 Rockledge Drive, Room 8128  
Bethesda, MD 20892  
Phone: 301-435-0422  
Email: [lauerm@nhlbi.nih.gov](mailto:lauerm@nhlbi.nih.gov)
