# Supplementary material
Source: PubMed Central journal article supplement (PMC4506707)

Supplementary Material for:

Predicting Productivity Returns on Investment: Thirty Years of Peer Review, Grant Funding, and Publication of Highly Cited Papers at the National Heart, Lung, and Blood Institute

Michael S Lauer, Narasimhan S. Danthi, Jonathan Kaltman, and Colin Wu

All from the Division of Cardiovascular Sciences, NHLBI

Online Figure I: Receiver operating characteristic curve of the ability of grant percentile ranking to predict a grant's publication of at least one top-10% paper. A false positive would occur if a grant with a percentile ranking below a certain cut-off failed to produce at least one top-10% paper, whereas a true positive would occur should such a paper be published.

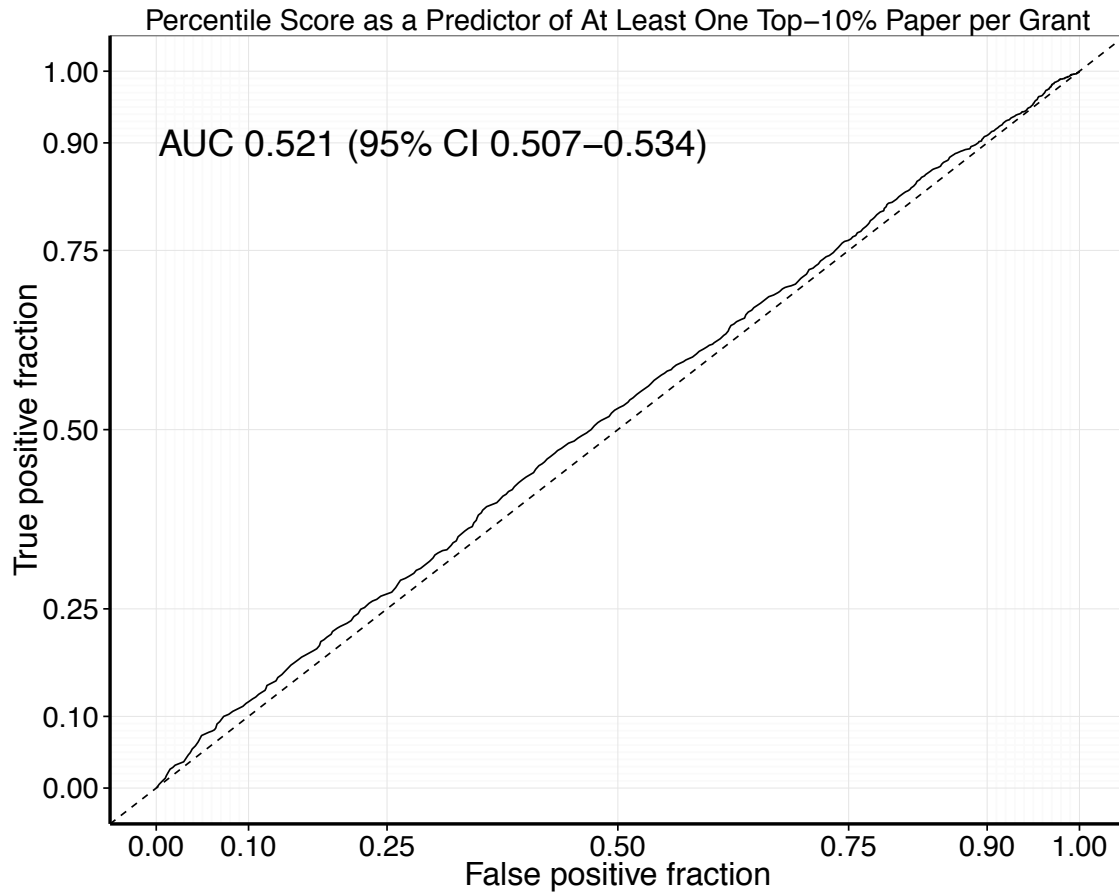

Online Figure II: Loess smoother and 95% confidence ranges for the association between requested total budgets and grant percentile ranking among 3101 de novo R01 applications submitted to NHLBI in 2011 and 2012.

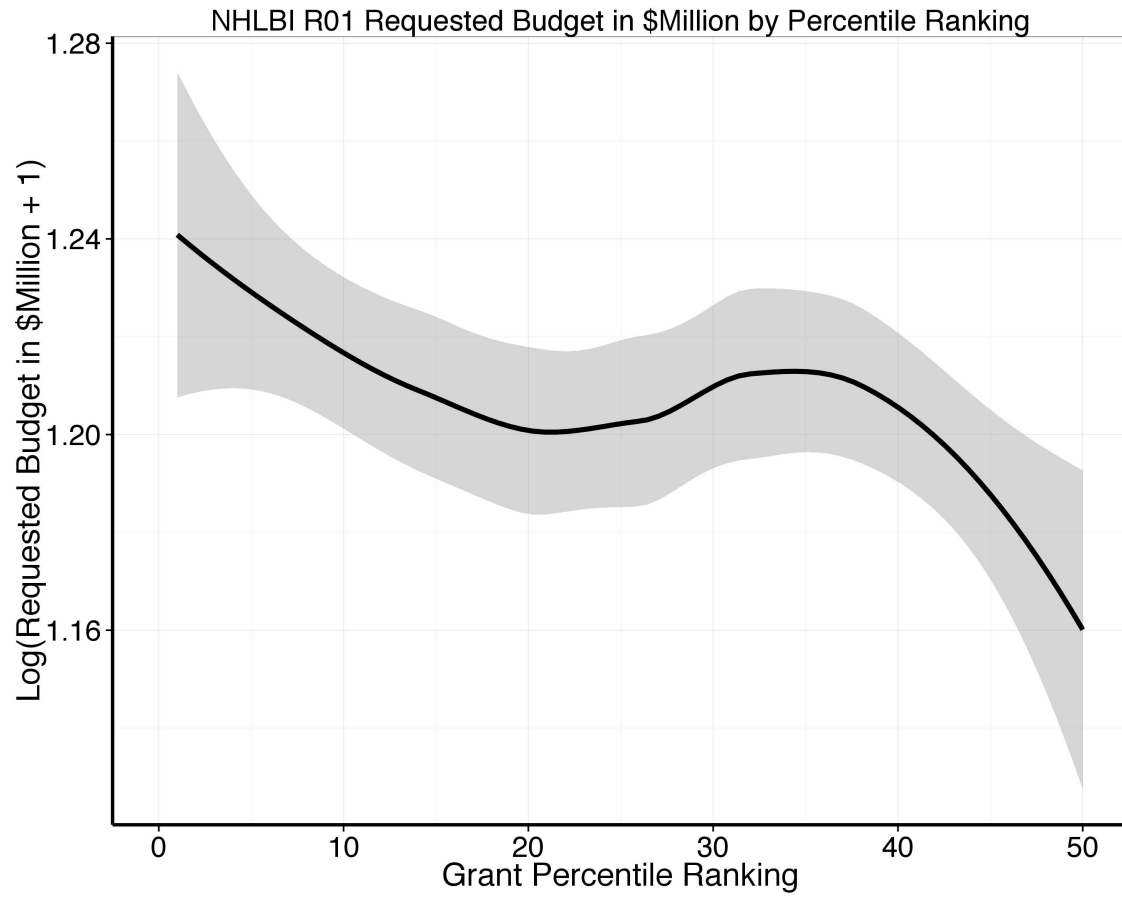

Online Figure III: Receiver operating characteristic curve of the ability of grant percentile ranking to predict a grant's publication of at least one top-10% paper per \$million spent. A false positive would occur if a grant with a percentile ranking below a certain cut-off failed to produce at least one top-10% paper per \$million spent, whereas a true positive would occur should such a paper be published.

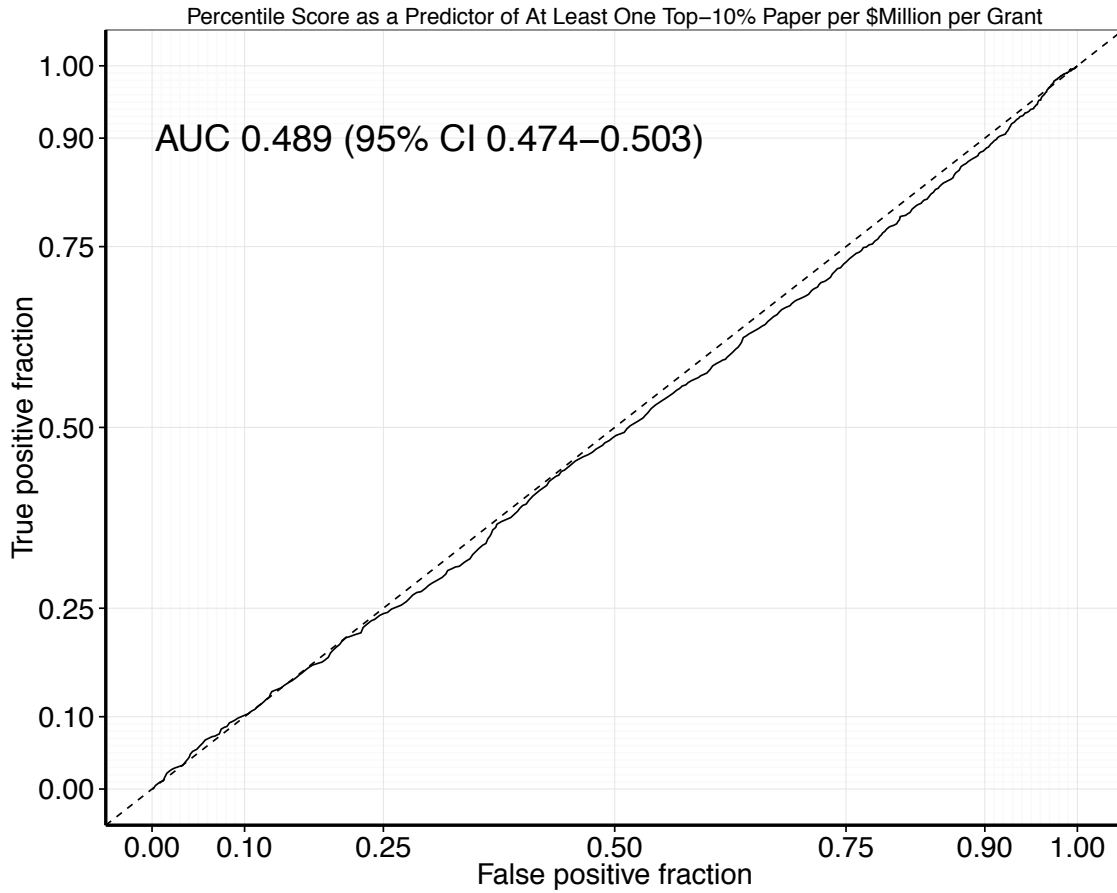

Supplement: NIHMS701909-supplement-306830R1_Online_Data_Supplement.pdf [file NIHMS701909-supplement-306830R1_Online_Data_Supplement.pdf]
